# Supplementary material for: Ecological Importance of Large-Diameter Trees in a Temperate Mixed-Conifer Forest
Source: PubMed Central journal article supplement (PMC3342248; doi:10.1371/journal.pone.0036131), 2012-05-02
Supplement: pone.0036131.s003.pdf [file pone.0036131.s003.pdf]

**Table S1** Vertebrate species reported in similar forest types within 5 km of the Yosemite Forest Dynamics Plot between 1980 and 2011. Data compiled from [S1.1-S1.5].

| Scientific name                  | Common name                     | Data source                        |
|----------------------------------|---------------------------------|------------------------------------|
| <b>MAMMAL SPECIES</b>            |                                 |                                    |
| <u>Rodent species</u>            |                                 |                                    |
| <i>Glacomys sabrinus</i>         | northern flying squirrel        | LiveTrap                           |
| <i>Microtus longicaudus</i>      | long-tailed vole                | LiveTrap                           |
| <i>Neotamias quadrimaculatus</i> | long-eared chipmunk             | LiveTrap                           |
| <i>Neotamias senex</i>           | shadow chipmunk                 | LiveTrap                           |
| <i>Neotoma</i> spp               | woodrat (probably bushy-tailed) | OwlPellet                          |
| <i>Peromyscus boleyii</i>        | brush mouse                     | LiveTrap                           |
| <i>Peromyscus maniculatus</i>    | deer mouse                      | LiveTrap                           |
| <i>Peromyscus truei</i>          | pinon mouse                     | LiveTrap                           |
| <i>Scapanus latimanus</i>        | broad-footed mole               | OwlPellet                          |
| <i>Sciurus griseus</i>           | western grey squirrel           | LiveTrap                           |
| <i>Sorex unknown species</i>     | unknown shrew                   | LiveTrap                           |
| <i>Spermophilus lateralis</i>    | golden-manteled ground squirrel | LiveTrap                           |
| <i>Spermophilus beecheyi</i>     | California ground squirrel      | LiveTrap                           |
| <i>Tamiasciurus douglasii</i>    | Douglas squirrel                | LiveTrap                           |
| <i>Thomomys monticola</i>        | mountain pocket gopher          | LiveTrap                           |
| <i>Zapus princeps</i>            | western jumping mouse           | LiveTrap                           |
| <u>Bat species</u>               |                                 |                                    |
| <i>Antrozous pallidus</i>        | pallid bat                      | OwlPellet                          |
| <i>Eptesicus fuscus</i>          | big brown bat                   | Pierson et al. 2006                |
| <i>Euderma maculatum</i>         | spotted bat                     | Pierson et al. 2006                |
| <i>Eumops perotis</i>            | western mastiff bat             | Pierson et al. 2006                |
| <i>Lasionycteris noctivagans</i> | silver-haired bat               | Pierson et al. 2006                |
| <i>Lasiurus cinereus</i>         | hoary bat                       | Pierson et al. 2006                |
| <i>Myotis californicus</i>       | California myotis               | Pierson et al. 2006                |
| <i>Myotis evotis</i>             | long-eared myotis               | Pierson et al. 2006                |
| <i>Myotis thysanodes</i>         | fringed myotis                  | Pierson et al. 2006                |
| <i>Myotis volans</i>             | long-legged myotis              | Pierson et al. 2006                |
| <i>Myotis yumanesis</i>          | Yuma myotis                     | Pierson et al. 2006                |
| <i>Tadarida brasiliensis</i>     | Mexican free-tailed bat         | Pierson et al. 2006                |
| <u>Carnivore species</u>         |                                 |                                    |
| <i>Urocyon cinereoargenteus</i>  | western grey fox                | Observation                        |
| <i>Felis concolor</i>            | mountain lion                   | Observation                        |
| <i>Canis latrans</i>             | coyote                          | Observation                        |
| <i>Ursus americanus</i>          | black bear                      | Observation                        |
| <i>Mephitis mephitis</i>         | striped skunk                   | Theoretically present <sup>†</sup> |

|                                        |                         |                                    |
|----------------------------------------|-------------------------|------------------------------------|
| <i>Lynx rufus</i>                      | bobcat                  | Theoretically present <sup>†</sup> |
| <i>Procyon lotor</i>                   | raccoon                 | Theoretically present <sup>†</sup> |
| <u>Hooved mammal species</u>           |                         |                                    |
| <i>Odocoileus hemionus</i>             | mule deer               | Observation                        |
| AVIAN SPECIES                          |                         |                                    |
| <u>Raptor species</u>                  |                         |                                    |
| <i>Accipiter gentilis</i>              | northern goshawk        | Observation                        |
| <i>Accipiter striatus</i>              | sharp-shinned hawk      | Theoretically present <sup>†</sup> |
| <i>Aegolius acadicus</i>               | northern saw-whet owl   | Observation                        |
| <i>Otus flammeolus</i>                 | flammulated owl         | Observation                        |
| <i>Otus kennicottii</i>                | western screech owl     | Observation                        |
| <i>Glaucidium gnoma</i>                | northern pygmy-owl      | Observation                        |
| <i>Strix occidentalis occidentalis</i> | California spotted owl  | Observation                        |
| <u>Passerine species</u>               |                         |                                    |
| <i>Patagioenas fasciata</i>            | band-tailed pigeon      |                                    |
| <i>Piranga ludoviciana</i>             | western tanager         | Observation                        |
| <i>Turdus migratorius</i>              | American robin          | Observation                        |
| <i>Catharus guttatus</i>               | hermit thrush           | Theoretically present <sup>†</sup> |
| <i>Dryocopus pileatus</i>              | Pileated woodpecker     | Observation                        |
| <i>Contopus sordidulus</i>             | western wood-pewee      | Observation                        |
| <i>Contopus cooperi</i>                | olive-sided flycatcher  | Theoretically present <sup>†</sup> |
| <i>Empidonax hammondi</i>              | Hammond's flycatcher    | Observation                        |
| <i>Empidonax oberholseri</i>           | dusky flycatcher        | Theoretically present <sup>†</sup> |
| <i>Corvus corax</i>                    | common raven            | Observation                        |
| <i>Cyanocitta stelleri</i>             | Stellar's jay           | Observation                        |
| <i>Colaptes auratus</i>                | northern flicker        | Observation                        |
| <i>Sphyrapicus thyroideus</i>          | Williamson's sapsucker  | Theoretically present <sup>†</sup> |
| <i>Sphyrapicus nuchalis</i>            | red-naped sapsucker     | Theoretically present <sup>†</sup> |
| <i>Sphyrapicus ruber</i>               | red-breasted sapsucker  | Theoretically present <sup>†</sup> |
| <i>Picoides villosus</i>               | hairy woodpecker        | Theoretically present <sup>†</sup> |
| <i>Picoides albolarvatus</i>           | white-headed woodpecker | Theoretically present <sup>†</sup> |
| <i>Vireo cassinii</i>                  | Cassin's vireo          | Theoretically present <sup>†</sup> |
| <i>Vireo gilvus</i>                    | warbling vireo          | Theoretically present <sup>†</sup> |
| <i>Chaetura vauxi</i>                  | Vaux's swift            | Theoretically present <sup>†</sup> |
| <i>Calypte anna</i>                    | Anna's hummingbird      | Theoretically present <sup>†</sup> |
| <i>Poecile gambeli</i>                 | mountain chickadee      | Observation                        |
| <i>Sitta canadensis</i>                | red-breasted nuthatch   | Observation                        |
| <i>Sitta pygmaea</i>                   | pygmy nuthatch          | Theoretically present <sup>†</sup> |
| <i>Certhia americana</i>               | brown creeper           | Observation                        |
| <i>Troglodytes hiemalis</i>            | winter wren             | Observation                        |

|                                         |                                 |                                    |
|-----------------------------------------|---------------------------------|------------------------------------|
| <i>Regulus satrapa</i>                  | golden-crowned kinglet          | Theoretically present <sup>†</sup> |
| <i>Dendroica coronata</i>               | yellow-rumped warbler           | Theoretically present <sup>†</sup> |
| <i>Junco hyemalis</i>                   | dark-eyed junco                 | Observation                        |
| <i>Oreothlypis celata</i>               | orange-crowned warbler          | Theoretically present <sup>†</sup> |
| <i>Bombycilla cedrorum</i>              | cedar waxwing                   | Theoretically present <sup>†</sup> |
| <i>Oreothlypis ruficapilla</i>          | Nashville warbler               | Theoretically present <sup>†</sup> |
| <i>Dendroica nigrescens</i>             | black-throated gray warbler     | Theoretically present <sup>†</sup> |
| <i>Dendroica townsendi</i>              | Townsend's warbler              | Observation                        |
| <i>Dendroica occidentalis</i>           | hermit warbler                  | Theoretically present <sup>†</sup> |
| <i>Loxia curvirostra</i>                | red crossbill                   | Theoretically present <sup>†</sup> |
| <i>Spinus pinus</i>                     | pine siskin                     | Theoretically present <sup>†</sup> |
| <i>Coccothraustes vespertinus</i>       | evening grosbeak                | Theoretically present <sup>†</sup> |
| <b>AMPHIBIAN SPECIES</b>                |                                 |                                    |
| <i>Batrachoseps</i> spp                 | slender salamander              | Theoretically present <sup>†</sup> |
| <i>Bufo boreas halophilus</i>           | western toad                    | Observation                        |
| <i>Ensatina eschscholtzii platensis</i> | Sierra Nevada ensatina          | Observation                        |
| <i>Pseudacris regilla</i>               | Pacific tree frog               | Observation                        |
| <i>Taricha torosa sierrae</i>           | Sierra newt                     | Theoretically present <sup>†</sup> |
| <b>REPTILE SPECIES</b>                  |                                 |                                    |
| <i>Charina bottae</i>                   | northern rubber boa             | Theoretically present <sup>†</sup> |
| <i>Contia tenuis</i>                    | sharp-tailed snake              | Theoretically present <sup>†</sup> |
| <i>Diadophis punctatus pulchellus</i>   | coral-bellied ring-necked snake | Theoretically present <sup>†</sup> |
| <i>Elgaria coerulea palmeri</i>         | Sierra alligator lizard         | Theoretically present <sup>†</sup> |
| <i>Eumeces gilberti gilberti</i>        | Gilbert's skink                 | Theoretically present <sup>†</sup> |
| <i>Sceloporus occidentalis taylori</i>  | Sierra fence lizard             | Theoretically present <sup>†</sup> |
| <i>Thamnophis couchii</i>               | Sierra garter snake             | Theoretically present <sup>†</sup> |

<sup>†</sup>Theoretically present based on <http://www.nps.gov/yose/naturescience/wildlifespecies.htm> as accessed on 26 August 2011

## References

- S1.1 Meyer MD, North MP, Kelt DA (2007) Nest trees of northern flying squirrel in Yosemite National Park, California. *Southwestern Naturalist* 52: 157-161.
- S1.2 Pierson ED, Rainey WE, Chow LS (2006) Bat use of the giant sequoia groves in Yosemite National Park. Yosemite Fund Report, Yosemite National, California.
- S1.3 Roberts SL (2008) The effect of fire on California spotted owls and their mammalian prey in the central Sierra Nevada, California. Dissertation. University of California Davis.
- S1.4 Roberts SL, van Wagtenonk JW, Kelt DA, Miles AK, Lutz JA (2008) Modeling the effects of fire severity and spatial complexity on small mammals in Yosemite National Park, California. *Fire Ecology* 4(2): 83-104.
- S1.5 Roberts SL, van Wagtenonk JW, Miles AK, Kelt DA (2011) Effects of fire on California spotted owl occupancy in a late-successional forest. *Biological Conservation* 144: 610-619.
